# Supplementary material
Source: publisher site journal article supplement (https://www.dovepress.com/article/400058)
Supplement: Supplementary file 1 [file get_supplementary_file.php]

Supplementary Material

Table 1: Herman Single Factor test

| Factor | Initial Eigenvalues | | | Extraction Sums of Squared Loadings | | |
| --- | --- | --- | --- | --- | --- | --- |
| Total | % of Variance | Cumulative % | Total | % of Variance | Cumulative % |
| 1 | 8.806 | 11.900 | 11.900 | 7.972 | 10.773 | 10.773 |
| 2 | 4.125 | 5.574 | 17.474 |  |  |  |
| 3 | 3.304 | 4.465 | 21.938 |  |  |  |
| 4 | 2.724 | 3.682 | 25.620 |  |  |  |
| 5 | 2.511 | 3.393 | 29.013 |  |  |  |
| 6 | 2.193 | 2.963 | 31.976 |  |  |  |
| 7 | 1.833 | 2.477 | 34.453 |  |  |  |
| 8 | 1.709 | 2.309 | 36.762 |  |  |  |
| 9 | 1.634 | 2.208 | 38.970 |  |  |  |
| 10 | 1.590 | 2.149 | 41.119 |  |  |  |
| 11 | 1.538 | 2.078 | 43.197 |  |  |  |
| 12 | 1.457 | 1.969 | 45.166 |  |  |  |
| 13 | 1.421 | 1.921 | 47.086 |  |  |  |
| 14 | 1.362 | 1.840 | 48.927 |  |  |  |
| 15 | 1.303 | 1.760 | 50.687 |  |  |  |
| 16 | 1.258 | 1.699 | 52.386 |  |  |  |
| 17 | 1.209 | 1.634 | 54.020 |  |  |  |
| 18 | 1.171 | 1.582 | 55.602 |  |  |  |
| 19 | 1.130 | 1.528 | 57.130 |  |  |  |
| 20 | 1.117 | 1.510 | 58.640 |  |  |  |
| 21 | 1.066 | 1.441 | 60.081 |  |  |  |
| 22 | 1.054 | 1.425 | 61.506 |  |  |  |
| 23 | 1.019 | 1.377 | 62.882 |  |  |  |
| 24 | .996 | 1.346 | 64.228 |  |  |  |
| 25 | .965 | 1.304 | 65.533 |  |  |  |
| 26 | .905 | 1.223 | 66.756 |  |  |  |
| 27 | .893 | 1.207 | 67.962 |  |  |  |
| 28 | .881 | 1.191 | 69.153 |  |  |  |
| 29 | .873 | 1.180 | 70.333 |  |  |  |
| 30 | .856 | 1.157 | 71.489 |  |  |  |
| 31 | .840 | 1.136 | 72.625 |  |  |  |
| 32 | .811 | 1.095 | 73.720 |  |  |  |
| 33 | .782 | 1.056 | 74.777 |  |  |  |
| 34 | .775 | 1.048 | 75.825 |  |  |  |
| 35 | .754 | 1.019 | 76.844 |  |  |  |
| 36 | .730 | .987 | 77.831 |  |  |  |
| 37 | .711 | .960 | 78.791 |  |  |  |
| 38 | .705 | .953 | 79.744 |  |  |  |
| 39 | .648 | .876 | 80.620 |  |  |  |
| 40 | .639 | .863 | 81.483 |  |  |  |
| 41 | .625 | .845 | 82.329 |  |  |  |
| 42 | .616 | .832 | 83.161 |  |  |  |
| 43 | .591 | .798 | 83.959 |  |  |  |
| 44 | .589 | .796 | 84.755 |  |  |  |
| 45 | .579 | .783 | 85.538 |  |  |  |
| 46 | .558 | .754 | 86.291 |  |  |  |
| 47 | .540 | .729 | 87.021 |  |  |  |
| 48 | .535 | .723 | 87.743 |  |  |  |
| 49 | .500 | .676 | 88.419 |  |  |  |
| 50 | .488 | .660 | 89.079 |  |  |  |
| 51 | .487 | .658 | 89.738 |  |  |  |
| 52 | .470 | .635 | 90.372 |  |  |  |
| 53 | .457 | .618 | 90.990 |  |  |  |
| 54 | .449 | .606 | 91.596 |  |  |  |
| 55 | .432 | .584 | 92.181 |  |  |  |
| 56 | .426 | .576 | 92.757 |  |  |  |
| 57 | .414 | .559 | 93.316 |  |  |  |
| 58 | .409 | .553 | 93.869 |  |  |  |
| 59 | .373 | .504 | 94.373 |  |  |  |
| 60 | .369 | .499 | 94.872 |  |  |  |
| 61 | .364 | .492 | 95.364 |  |  |  |
| 62 | .344 | .465 | 95.829 |  |  |  |
| 63 | .338 | .456 | 96.286 |  |  |  |
| 64 | .324 | .438 | 96.723 |  |  |  |
| 65 | .318 | .429 | 97.153 |  |  |  |
| 66 | .296 | .400 | 97.553 |  |  |  |
| 67 | .278 | .375 | 97.928 |  |  |  |
| 68 | .264 | .357 | 98.285 |  |  |  |
| 69 | .256 | .346 | 98.632 |  |  |  |
| 70 | .249 | .336 | 98.968 |  |  |  |
| 71 | .218 | .295 | 99.263 |  |  |  |
| 72 | .197 | .266 | 99.529 |  |  |  |
| 73 | .183 | .247 | 99.776 |  |  |  |
| 74 | .166 | .224 | 100.000 |  |  |  |
| Extraction Method: Principal Axis Factoring. | | | | | | |

Table 2: Assessment of Normality

| Variable | min | max | skew | c.r. | kurtosis | c.r. |
| --- | --- | --- | --- | --- | --- | --- |
| Extraversion | 1.125 | 5.000 | -.112 | -.818 | -.180 | -.656 |
| Agreeableness | 1.778 | 4.889 | -.417 | -3.048 | .195 | .712 |
| Conscientiousness | 1.667 | 4.889 | .055 | .401 | -.134 | -.488 |
| Neuroticism | 1.375 | 5.000 | -.062 | -.450 | -.284 | -1.038 |
| Openness | 2.000 | 5.000 | -.234 | -1.709 | .023 | .086 |
| Global TEI | 2.470 | 6.400 | -.072 | -.527 | .230 | .839 |
| Multivariate |  |  |  |  | 2.728 | 2.490 |

Table 3: Tolerance and VIF values for predictor variables

|  | Collinearity Statistics | |
| --- | --- | --- |
| Variables | Tolerance | VIF |
| Extraversion | .912 | 1.096 |
| Agreeableness | .851 | 1.175 |
| Conscientiousness | .886 | 1.128 |
| Neuroticism | .867 | 1.153 |
| Openness | .893 | 1.120 |

Table 4: Correlation matrix for study variables

|  | E | A | C | N | O | WB | SC | EM | Soc |
| --- | --- | --- | --- | --- | --- | --- | --- | --- | --- |
| Agreeableness (A) | .159** |  |  |  |  |  |  |  |  |
| Conscientiousness (C) | .111* | .261** |  |  |  |  |  |  |  |
| Neuroticism(N) | -.250** | -.259** | -.219** |  |  |  |  |  |  |
| Openness (O) | .176** | .257** | .217** | -.139* |  |  |  |  |  |
| Wellbeing (WB) | .368** | .246** | .327** | -.341** | .369** |  |  |  |  |
| Self-control (SC) | .162** | .250** | .299** | -.503** | .175** | .382** |  |  |  |
| Emotionality (Em) | .223** | .306** | .216** | -.207** | .213** | .445** | .289** |  |  |
| Sociability (Soc) | .294** | .114* | .266** | -.270** | .272** | .387** | .233** | .343** |  |
| Global TEI | .386** | .336** | .413** | -.455** | .370** | .770** | .621** | .743** | .675** |

Note: Global TEI: Global Trait Emotional Intelligence

*p<.05; **p<.01

Table 5: Descriptive statistics for males and females for the study variables

|  | GENDER | N | Mean | SD | SEM |
| --- | --- | --- | --- | --- | --- |
| Extraversion | Male | 149 | 3.2483 | .68403 | .05604 |
| Female | 171 | 3.4108 | .74994 | .05735 |
| Agreeableness | Male | 149 | 3.6383 | .60143 | .04927 |
| Female | 171 | 3.8694 | .48781 | .03730 |
| Conscientiousness | Male | 149 | 3.4087 | .63884 | .05234 |
| Female | 171 | 3.3996 | .59440 | .04546 |
| Neuroticism | Male | 149 | 2.8398 | .68436 | .05606 |
| Female | 171 | 3.1762 | .67296 | .05146 |
| Openness | Male | 149 | 3.5383 | .53721 | .04401 |
| Female | 171 | 3.6678 | .43259 | .03308 |
| Wellbeing | Male | 149 | 5.2353 | .85547 | .07008 |
| Female | 171 | 5.2669 | .95383 | .07294 |
| Self-control | Male | 149 | 4.2348 | .82937 | .06794 |
| Female | 171 | 4.2035 | .97858 | .07483 |
| Emotionality | Male | 149 | 4.5522 | .86669 | .07100 |
| Female | 171 | 4.8175 | .92898 | .07104 |
| Sociability | Male | 149 | 4.5931 | .85474 | .07002 |
| Female | 171 | 4.6051 | .95024 | .07267 |
| Global TEI | Male | 149 | 4.6818 | .60783 | .04980 |
| Female | 171 | 4.7585 | .70672 | .05404 |

Note: Global TEI: Global Trait Emotional Intelligence

Table 6: Gender differences between males and females on the study variables

|  |  | Levene's Test for Equality of Variances | | t-test for Equality of Means | | | | | | |
| --- | --- | --- | --- | --- | --- | --- | --- | --- | --- | --- |
|  |  | F | Sig. | t | df | p | Mean Difference | Std. Error Difference | 95% Confidence Interval of the Difference | |
| Lower | Upper |
| Extraversion | Equal variances assumed | 1.584 | .209 | -2.014 | 318 | .045 | -.16250 | .08069 | -.32125 | -.00374 |
| Equal variances not assumed |  |  | -2.027 | 317.323 | .044 | -.16250 | .08018 | -.32025 | -.00474 |
| Agreeableness | Equal variances assumed | 4.180 | .042 | -3.793 | 318 | .000 | -.23107 | .06093 | -.35094 | -.11120 |
| Equal variances not assumed |  |  | -3.739 | 284.827 | .000 | -.23107 | .06180 | -.35271 | -.10942 |
| Conscientiousness | Equal variances assumed | 1.125 | .290 | .131 | 318 | .896 | .00904 | .06898 | -.12667 | .14475 |
| Equal variances not assumed |  |  | .130 | 304.603 | .896 | .00904 | .06932 | -.12737 | .14545 |
| Neuroticism | Equal variances assumed | .361 | .548 | -4.425 | 318 | .000 | -.33640 | .07602 | -.48596 | -.18685 |
| Equal variances not assumed |  |  | -4.420 | 310.540 | .000 | -.33640 | .07610 | -.48615 | -.18666 |
| Openness | Equal variances assumed | 11.057 | .001 | -2.388 | 318 | .018 | -.12958 | .05425 | -.23632 | -.02284 |
| Equal variances not assumed |  |  | -2.354 | 283.656 | .019 | -.12958 | .05506 | -.23795 | -.02121 |
| Wellbeing | Equal variances assumed | 1.152 | .284 | -.310 | 318 | .757 | -.03160 | .10191 | -.23211 | .16891 |
| Equal variances not assumed |  |  | -.312 | 317.727 | .755 | -.03160 | .10115 | -.23061 | .16742 |
| Self-control | Equal variances assumed | 4.906 | .027 | .306 | 318 | .760 | .03126 | .10223 | -.16987 | .23238 |
| Equal variances not assumed |  |  | .309 | 317.766 | .757 | .03126 | .10108 | -.16761 | .23012 |
| Emotionality | Equal variances assumed | .607 | .437 | -2.629 | 318 | .009 | -.26527 | .10092 | -.46383 | -.06671 |
| Equal variances not assumed |  |  | -2.641 | 316.502 | .009 | -.26527 | .10044 | -.46288 | -.06766 |
| Sociability | Equal variances assumed | 1.457 | .228 | -.119 | 318 | .906 | -.01206 | .10165 | -.21205 | .18794 |
| Equal variances not assumed |  |  | -.119 | 317.670 | .905 | -.01206 | .10091 | -.21060 | .18649 |
| Global TEI | Equal variances assumed | 2.830 | .094 | -1.033 | 318 | .302 | -.07673 | .07425 | -.22281 | .06936 |
| Equal variances not assumed |  |  | -1.044 | 317.950 | .297 | -.07673 | .07349 | -.22131 | .06786 |

Note: Global TEI: Global Trait Emotional Intelligence
